# Supplementary material
Source: MDPI journal article supplement (https://www.mdpi.com/2073-4344/11/10/1209)
Supplement: s1 [file s1]

## Supporting Informations

### Structural and Functional Behaviour of Ce-doped Wide-Bandgap Semiconductors for Photo-Catalytic Applications

Giulia Forghieri<sup>1</sup>, Danny Zanardo<sup>1</sup>, Elena Ghedini<sup>1</sup>, Federica Menegazzo<sup>1</sup>, Alessia Giordana<sup>2</sup>, Giuseppina Cerrato<sup>2</sup>, Alessandro Di Michele<sup>3</sup>, Giuseppe Cruciani<sup>4</sup> and Michela Signoretto<sup>1\*</sup>

<sup>1</sup> CATMAT lab, Department of Molecular Sciences and Nanosystems, Ca' Foscari University of Venice and INSTM RU VE, via Torino 155, Venice 30172, Italy.

<sup>2</sup> Department of Chemistry and NIS Interdept. Centre, University of Turin, and INSTM RU TO via Pietro Giuria 7, Turin 10125, Italy.

<sup>3</sup> Department of Physics and Geology, University of Perugia, via Pascolo 1, Perugia I-06123, Italy.

<sup>4</sup> Department of Physics and Earth Sciences, University of Ferrara, via G. Saragat 1, Ferrara I-44122, Italy.

\* Corresponding author. Email address: miky@unive.it

Figure S1 shows the photocatalytic tests for CO<sub>2</sub> reduction. The O<sub>2</sub> released by CZ20, CCZ20 and CT20 during the reaction, was attributed to the possible photo-driven reduction of Ce<sup>4+</sup> into Ce<sup>3+</sup> acting as electron sink. Only bare ZnO and TiO<sub>2</sub> resulted able to photo-convert CO<sub>2</sub> into methane.

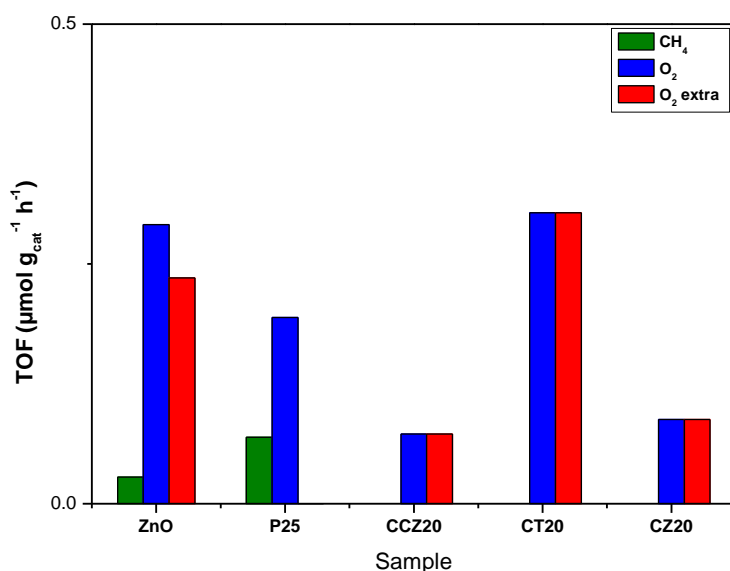

*Figure S1 Calculated TOF of ZnO- and TiO<sub>2</sub>-based materials exposed to 6 h UV illumination in presence of gaseous CO<sub>2</sub> and H<sub>2</sub>O.*

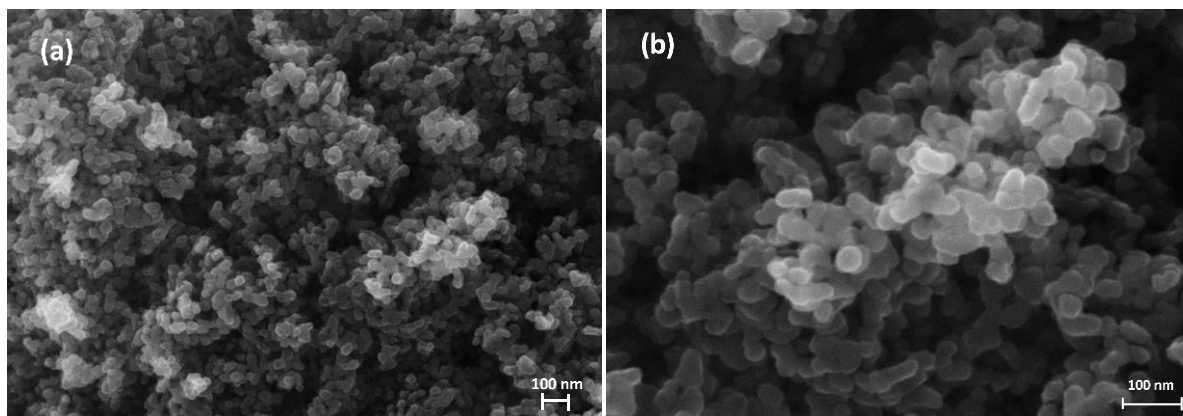

**Figure S2** SEM of bare ZnO showing aggregates at (a) 100 kx and (b) 250 kx magnification.

Figure S3 shows the BJH pore distribution with an average pore diameter of ~18 nm.

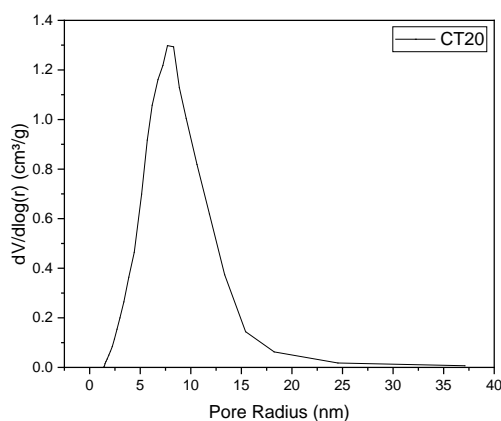

**Figure S3** Pore distribution of CT20

In line with DRS and XRD data, results showed that the bandgap of CZ20 and CCZ20, evaluated as  $E_g \cong 3.25 \text{ eV}$  (figure S4), was not considerably affected by the presence of cerium. However, a red shift in the absorption was still detected as possible consequence of defects content and of the presence of  $\text{Ce}^{3+}$  centres on the surface.

Conversely, in CT20 the presence of cerium modified the value of the bandgap energy  $E_g$  for indirect type of transitions when compared to bare  $\text{TiO}_2$  (P25, Evonik). The Tauc plots suggested a bandgap shift from  $3.26 \text{ eV}$  to  $E_g = 2.39 \text{ eV}$  when  $\text{TiO}_2$  was treated as indirect bandgap semiconductor (figure S4). Therefore, the bandgap modification was more pronounced for CT20 with respect to CCZ20 and CZ20, also as the possible effect of the as well remarked structural modifications.

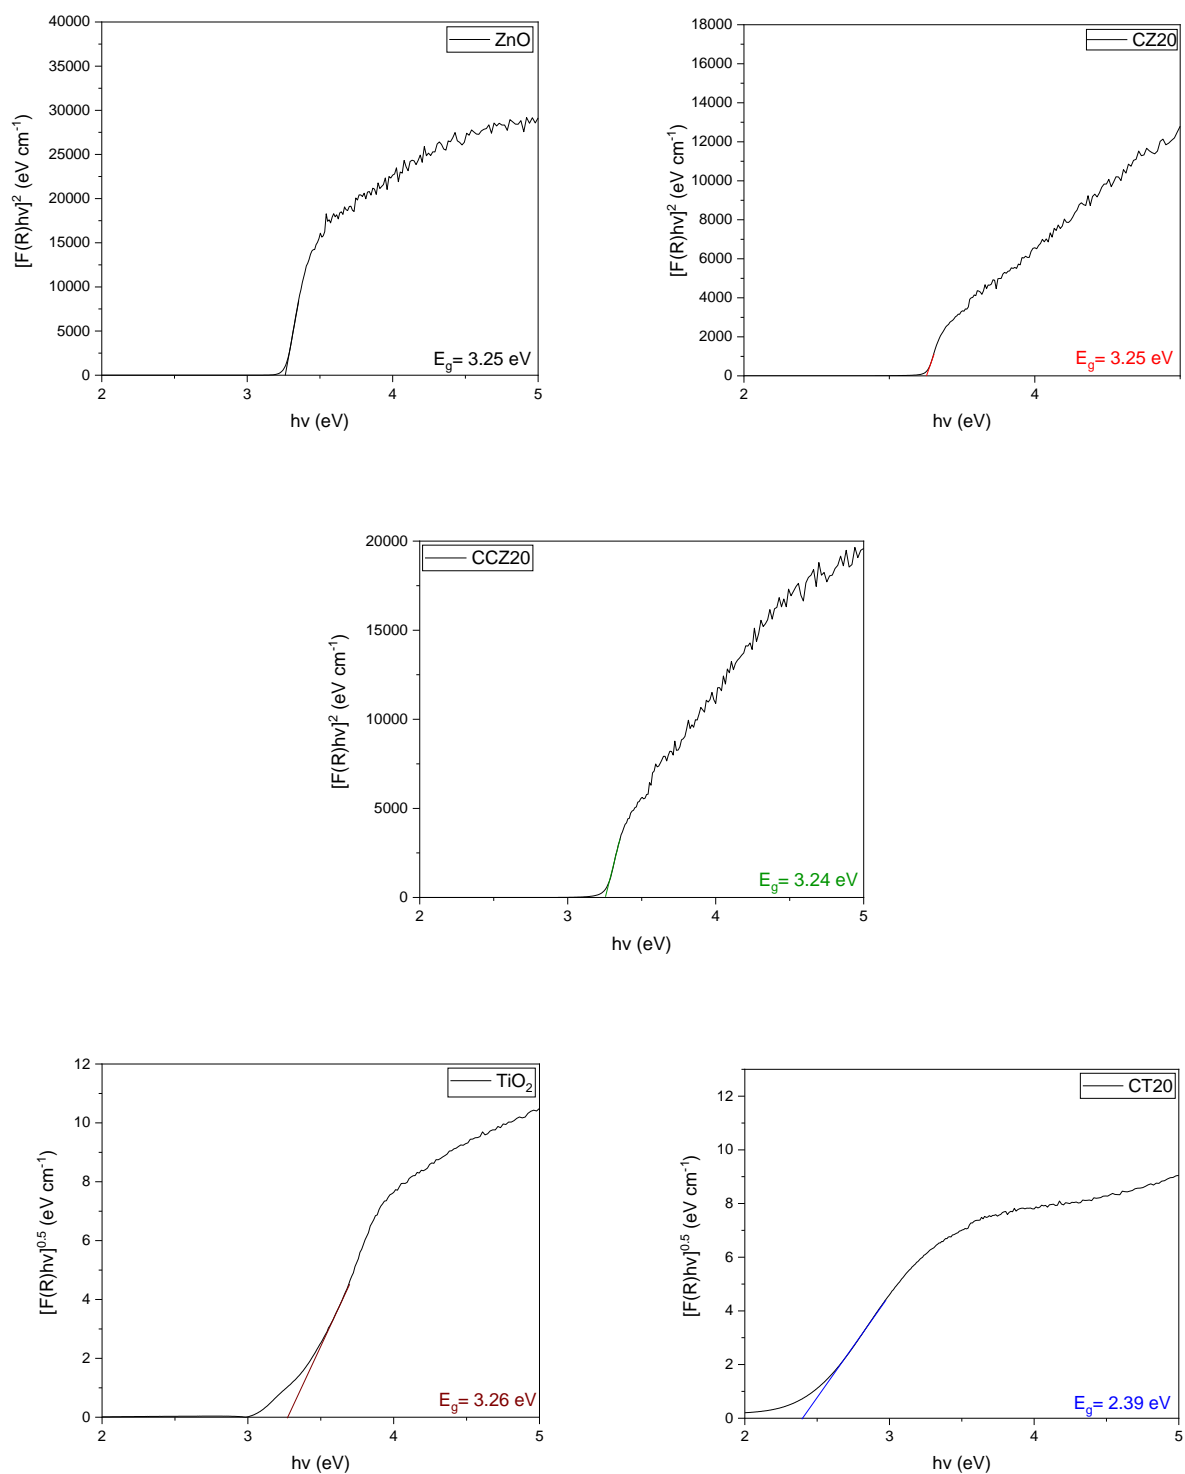

**Figure S4** Tauc plots of (up) ZnO and ZnO-based composites calculated with  $m=1/2$  as and TiO<sub>2</sub>-based samples calculated using  $m=2$  considered as indirect bandgap semiconductor.

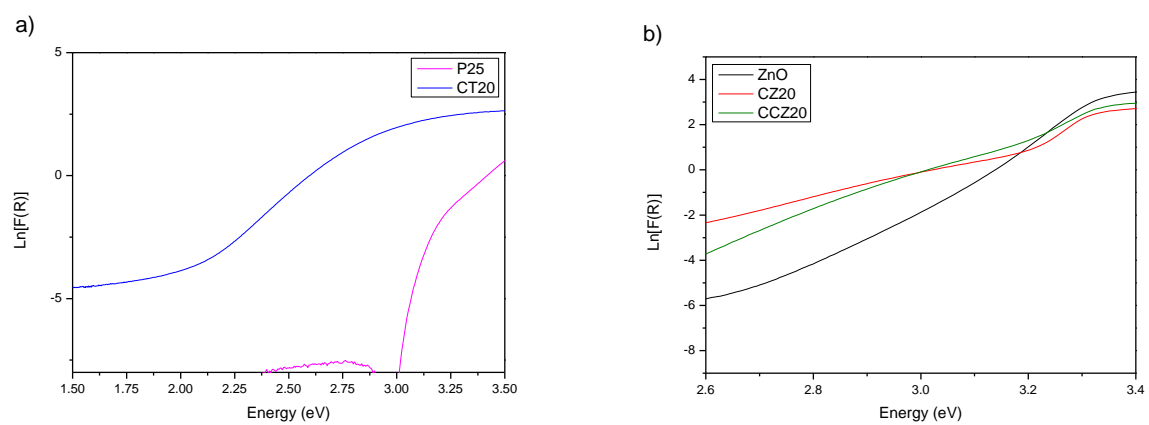

**Figure S5** Urbach plot of a)  $\text{TiO}_2$ -based and b)  $\text{ZnO}$ -based materials.
